# Supplementary material for: Beta band oscillations in motor cortex reflect neural population signals that delay movement onset
Source: eLife journal article supplement (doi:10.7554/elife.24573), 2017-05-03
Supplement: supp [file elife_poa_e24573_Supplementary_File_1.xlsx]

## Sheet: Final
Figure/Test Description	Test	N	Statistic	P-value			Details
*** NOTE: In the following analyses, only reward trials with Movement Onest times between 0.0 - 0.7 seconds are used except where noted
Group Difference between Normalized Beta Power at Go Cue
2a	Two tailed Kruskal-Wallis Test for group difference	1184 (all reward trials)	H = 47.44	2.803e-10
2b	"	2328 (all reward trials)	H = 250.1	< 5e-20
2c	"	1042 (all reward trials)	H = 48.11	2.023e-10
Cuzick's Test for Trend in Movement Onset Time
3a (Monkey S)	Two-tailed Cuzick's test	1183	z = 5.7629	8.26699e-09
3b (Monkey C)	"	2168	z = 11.9873	< 5e-20
3c (Monkey G)	"	1028	z = 5.856	4.729e-09
Combined Across Monkeys	"	4379	z = 9.0595	< 5e-20
Cuzick's Test for Trend of Increasing Time to Beta Target with Higher Beta Target
4a (Monkey S)	Two-tailed Student's t-test for non-zero slope in linear regression	1183	t = 0.7119	0.476
4b (Monkey C)	"	2168	t = 2.352	0.0188
4c (Monkey G)	"	1028	t = 1.651	0.0991
Combined Across Monkeys	"	4379	t = 2.0832	0.0373
Monkey C	Two-tailed Cuzick's Test on MOT_res	2168	z = 13.191	< 5e-20
Combined Across Monkeys	Two-tailed Cuzick's Test on MOT_res	4379	z = 13.615	<5e-20
Table 2: Cuzick's Test for Other reaching kinematics:
Onset Speed
Monkey S	Two-tailed Cuzick's test	1183	z = 1.37802	0.1682
Monkey C	"	2168	z = -3.5925	0.0003276
Monkey G	"	1028	z = 0.073356	0.94152
Combined Across Monkeys	"	4379	z = -1.2443	0.21339
Peak Speed
Monkey S	Two-tailed Cuzick's test	1183	z = 4.4757	7.615e-06
Monkey C	"	2168	z = 4.142	3.4426e-05
Monkey G	"	1028	z = -1.3299	0.1836
Combined Across Monkeys	"	4379	z = 1.8339	0.0667
Onset Acceleration
Monkey S	Two-tailed Cuzick's test	1183	z = 1.9009	0.05732
Monkey C	"	2168	z = 2.5732	0.0100768
Monkey G	"	1028	z = 0.15943	0.87333
Combined Across Monkeys	"	4379	z = 0.8178	0.41345
Cuzick's Test for Trend of Increasing Movement Onset Time with Higher Beta Target -- Controls
4d, Monkey S, other reach target	Two-tailed Cuzick's test	735	z = 3.972	7.118e-05
4e, Monkey C, reverse screen position of beta targets	Two-tailed Cuzick's test	2113	z = -5.9713	2.3538e-09
Cuzick's Test for Trend in Movement Onset Time When Labeling by Non-normalized Beta Power Quartile
5a (Monkey S)	Two-tailed Cuzick's test	1183	z = 7.1621	7.9448e-13
5b (Monkey C)	"	2168	z = 7.7663	7.99361e-15
5c (Monkey G)	"	1028	z = 7.70914	1.26565e-14
Combined Across Monkeys	"	4379	z = 6.168	6.924e-10
Cuzick's Test for Trend in Movement Onset Time When Labeling by Percent of On-Beta Events in Trial
Monkey S	Two-tailed Cuzick's test	1183	z = 7.5745	3.597e-14
Monkey C	"	2168	z = 5.4878	4.068e-08
Monkey G	"	1028	z = 7.8896	3.108e-15
Combined Across Monkeys	"	4379	z = 5.13014	2.895e-07
F-Test for Model Predicting Movement Onset Time with Low Freq (1-10Hz) vs. with Low Freq (1-10 Hz) and Beta Freq (25-40 Hz)
Monkey S	F-test	1183	F = 45.373	1.11e-16
Monkey C	F-test	2168	F = 4.477	1.11e-16
Monkey G	F-test	1028	F = 23.356	1.1102e-16
Combined Across Monkeys	F-test	4379	F = 123.83	1.1102e-16
F-Test for Model Predicting Movement Onset Time with High Freq (65-100Hz) vs. with High Freq (65-100Hz) and Beta Freq (25-40 Hz)
Monkey S	F-test	1183	F = 54.162	1.11e-16
Monkey C	F-test	2168	F = 28.531	1.11e-16
Monkey G	F-test	1028	F = 114.77	1.1102e-16
Combined Across Monkeys	F-test	4379	F = 199.20	1.1102e-16
Cuzick's Test for Trend in Movement Onset Time When Labeling by Non-Beta Frequency Bands
5d, 1-10 Hz, Monkey S	Two-tailed Cuzick's test	1183	z=-4.290212	1.785e-05
5d, 10-25 Hz, Monkey S	"	1183	z=-0.665988	0.505419
5d, 40-65 Hz, Monkey S	"	1183	z=-1.599386	0.109734
5d, 65-100 Hz, Monkey S	"	1183	z=-5.0279	4.958e-07
1 - 3 Hz, Monkey S	"	1183	z=-3.276	0.001052
4 - 7 Hz, Monkey S	"	1183	z=-3.245	0.001174
8 - 12 Hz, Monkey S	"	1183	z=-1.308499	0.1907
5e, 1-10 Hz, Monkey C	Two-tailed Cuzick's test	2168	z=-6.87737	6.09686e-12
5e, 10-25 Hz, Monkey C	"	2168	z=5.717297	1.08232e-08
5e, 40-65 Hz, Monkey C	"	2168	z=0.1569034	0.875321
5e, 65-100 Hz, Monkey C	"	2168	z=-4.2269834	2.36845e-05
1-3 Hz, Monkey C	"	2168	z=-6.98636	2.82105e-12
4 - 7 Hz, Monkey C	"	2168	z=-6.1334	8.6015e-10
8 - 12 Hz, Monkey C	"	2168	z=-1.77877	0.075277
5f, 1-10 Hz, Monkey G	Two-tailed Cuzick's test	1028	z=-8.4548	2.795e-17
5f, 10-25 Hz, Monkey G	"	1028	z=5.4768	4.33e-08
5f, 40-65 Hz, Monkey G	"	1028	z=-0.93465869	0.34996
5f, 65-100 Hz, Monkey G	"	1028	z=-1.77466	0.075936
1 - 3 Hz, Monkey G	"	1028	z=-8.20124	2.379e-16
4 - 7 Hz, Monkey G	"	1028	z=-6.1655	7.02394e-10
8 - 12 Hz, Monkey G	"	1028	z=0.06686	0.94669
1-10 Hz, Combined Across Monkeys	Two-tailed Cuzick's test	4379	z=-5.3049	1.127e-07
10-25 Hz, Combined Across Monkeys	"	4379	z=2.9728	0.002951
40-65 Hz, Combined Across Monkeys	"	4379	z=-0.4443	0.65681
65-100 Hz, Combined Across Monkeys	"	4379	z=-3.1079	0.001884
1 - 3 Hz, Combined Across Monkeys	"	4379	z=-5.0064	5.5457e-07
4 - 7 Hz, Combined Across Monkeys	"	4379	z=-4.3548	1.33172e-05
8 - 12 Hz, Combined Across Monkeys	"	4379	z=-0.97819	0.327979
Cuzick's Test for Trend in Movement Onset Time in 1-10 Hz Task Variant
Figure 5g	One-tailed Cuzick's test, Target ordering = 2, 3, 4, 1	1164	z = 7.1359	4.8073e-13
	One-tailed Cuzick's test, Target ordering = 1, 2, 3, 4	1164	z = -2.57129	0.9949
Figure 6
Monkey G, co-co slope comparisons	Paired two-tailed T-test	355	1.2749	0.20316
Monkey G, nf-nf slope comparisons	"	355	0.01686	0.986555
Monkey G, co0-nf0 slope comparisons	"	355	2.44898	0.01481
Monkey G, co1-nf0 slope comparisons	"	355	2.34029	0.019824
Monkey G, co0-nf1 slope comparisons	"	355	1.81029	0.0710989
Monkey G, co1-nf1 slope comparisons	"	355	1.73224	0.084102
Monkey C, co-co slope comparisons	Paired two-tailed T-test	513	-1.50746	0.13231
Monkey C, nf-nf slope comparisons	"	513	-1.30926	0.191032
Monkey C, co0-nf0 slope comparisons	"	513	10.3407	6.8763e-23
Monkey C, co1-nf0 slope comparisons	"	513	9.87968	3.47267e-21
Monkey C, co0-nf1 slope comparisons	"	513	11.5177	1.87152e-27
Monkey C, co1-nf1 slope comparisons	"	513	11.2578	2.02096e-26
Combined, co-co slope comparisons	Paired two-tailed T-test	868	0.62575	0.53164
Combined, nf-nf slope comparisons	"	868	-0.55467	0.57926
Combined, co0-nf0 slope comparisons	"	868	5.58964	3.048e-08
Combined, co1-nf0 slope comparisons	"	868	5.1782	2.786e-07
Combined, co0-nf1 slope comparisons	"	868	5.23156	2.1089e-07
Combined, co1-nf1 slope comparisons	"	868	4.8449	1.50024e-06
Within-Day PreMO vs. PostMO probability of crossing Movement Onset Threshold
Figure 7a, Monkey G, CO (blue)	two-tailed Student’s t-test on within-day means	6 days	T = 20.898	4.64627e-06
Figure 7a, Monkey G, NR (blue)	two-tailed Student’s t-test on within-day means	6 days	T = -7.4593	0.000683323
Figure 7a, Monkey C (inset), CO (blue)	two-tailed Student’s t-test on within-day means	4 days	T = -4.27110676	0.023559
Figure 7a, Monkey C (inset), NR (blue)	two-tailed Student’s t-test on within-day means	4 days	T = -13.5909	0.0008616
Figure 7d, CO (left) Monkey G	paired Student's t-test on within-day means of on-beta vs. off-beta	6 days	T = 6.742257	0.0010889
Figure 7d, NR (left) Monkey G	paired Student's t-test on within-day means of on-beta vs. off-beta	6 days	T=2.607317	0.04782
Figure 7e, CO (left) Monkey C	paired Student's t-test on within-day means of on-beta vs. off-beta	4 days	T = 1.324455	0.27721
Figure 7e, NR (left) Monkey C	paired Student's t-test on within-day means of on-beta vs. off-beta	4 days	T = 4.76324	0.01757
CO, Monkeys Combined	paired Student's t-test on within-day means of on-beta vs. off-beta	10 days	T = 4.24583	0.00216
NR, Monkeys Combined	paired Student's t-test on within-day means of on-beta vs. off-beta	10 days	T = 3.18505	0.01109
