# Supplementary figures and images for: Beta band oscillations in motor cortex reflect neural population signals that delay movement onset
Source: eLife journal article supplement (doi:10.7554/elife.24573), 2017-05-03

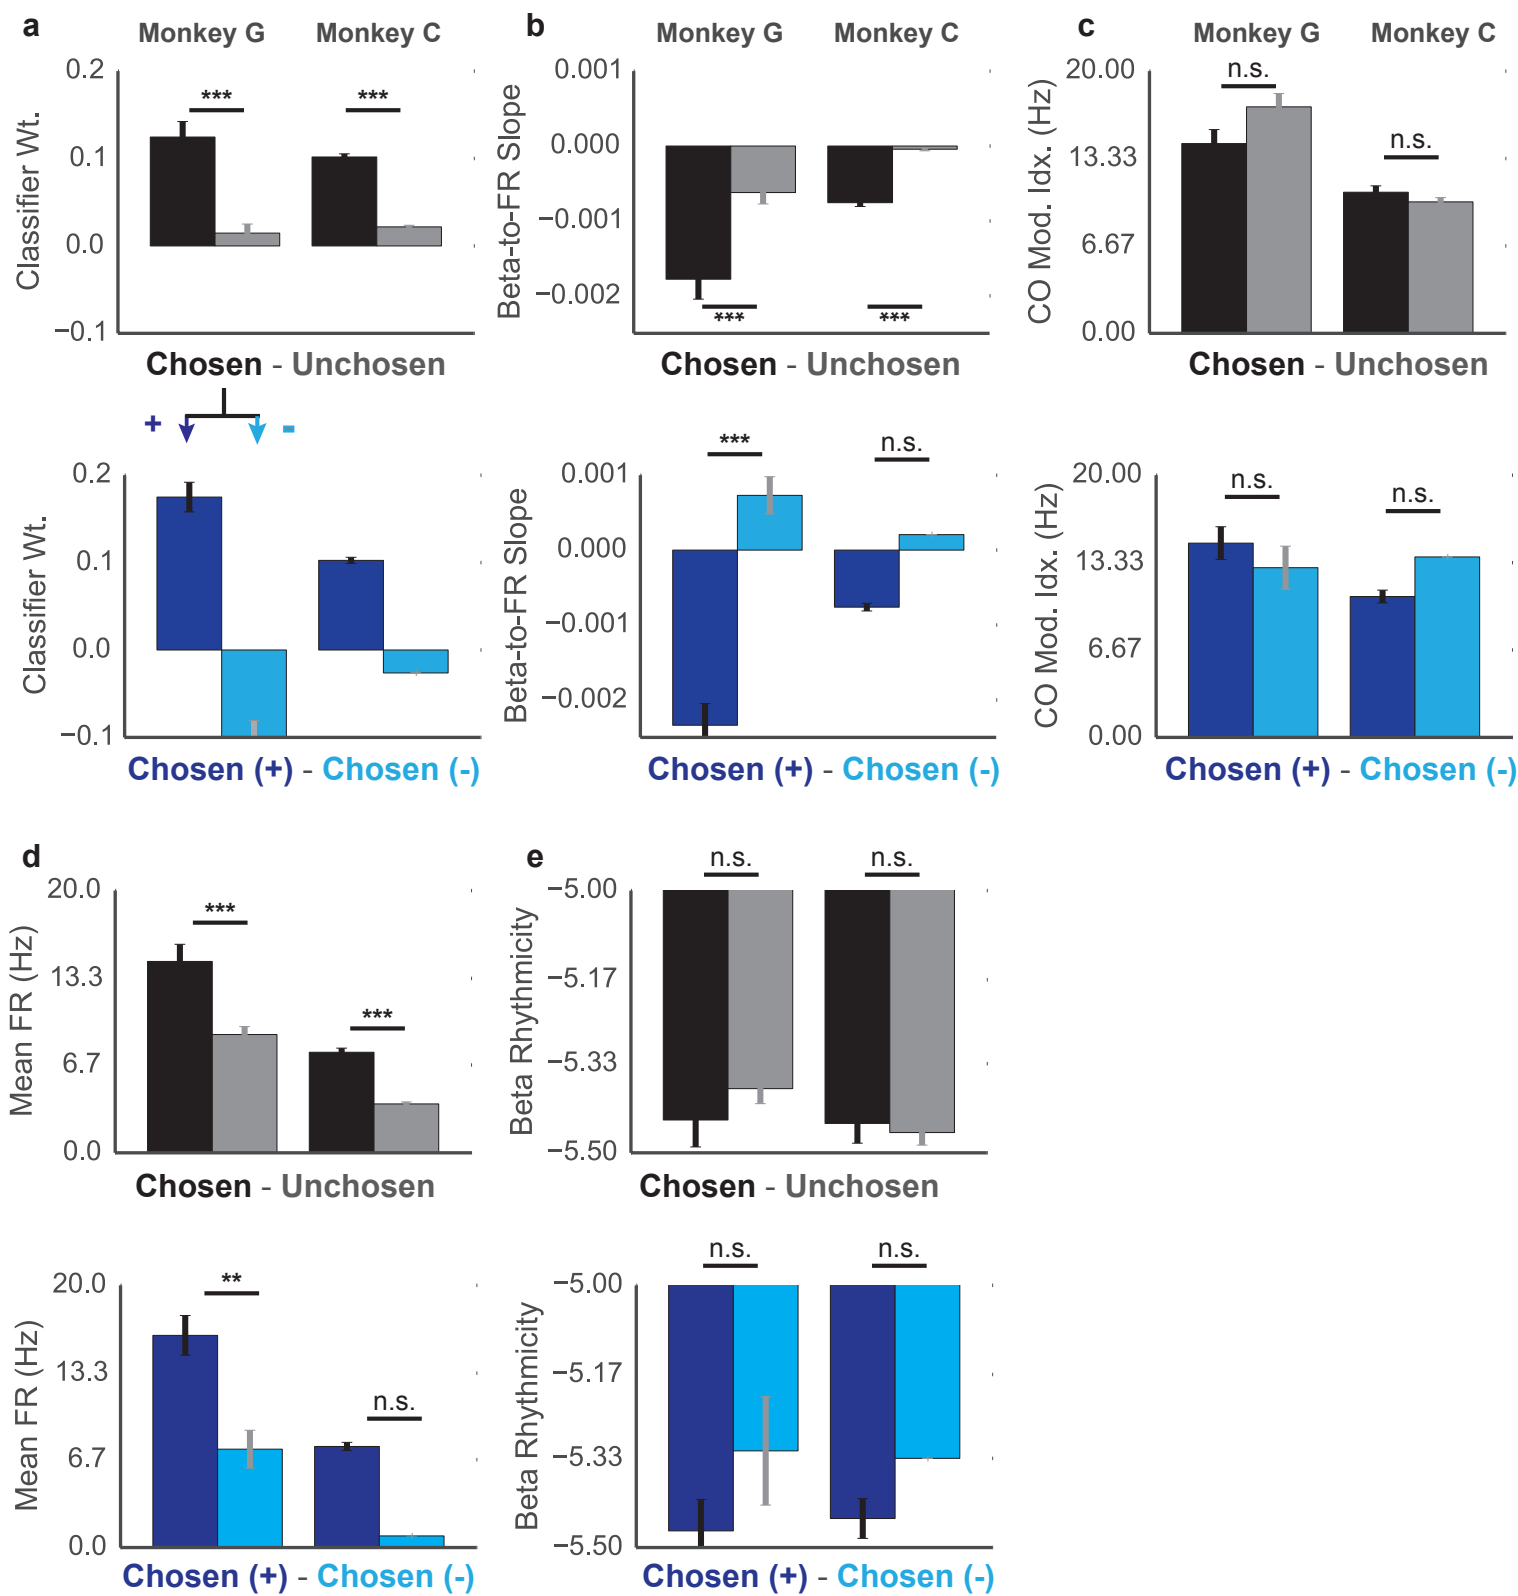

Supplement: supp [file elife_poa_e24573_Figure_7_figure_supplement_1.pdf › elife_poa_e24573_Figure_7_figure_supplement_1.pdf]
